# Supplementary material for: Prevalence of Age-Related Macular Degeneration in Europe: The Past and the Future
Source: PubMed Central journal article supplement — Ophthalmology. 2017 Dec;124(12):1753–63. doi: 10.1016/j.ophtha.2017.05.035 (PMC5755466; doi:10.1016/j.ophtha.2017.05.035), 2017-12
Supplement: mmc1.pdf [file mmc1.pdf]

# Figure 1

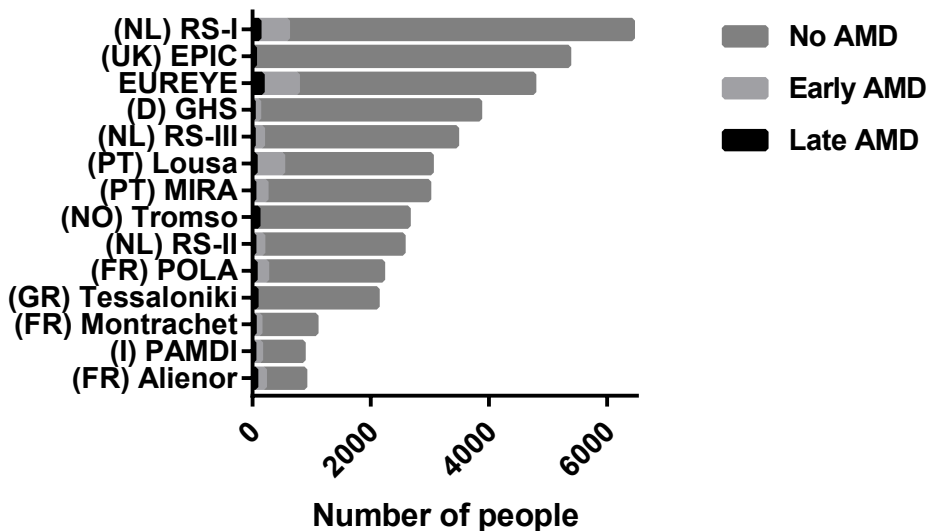

**Figure 1** Composition of population based cohorts subdivided in Early, Late, or no AMD (AMD stage 0 or 1).

The name of the study, time of conduction and the abbreviation of the country where the study was performed are depicted. EUREYE represents the European Eye Study and was conducted in 7 European countries. Studies are ranked according to their sample size.
