# Supplementary material for: Prevalence of Age-Related Macular Degeneration in Europe: The Past and the Future
Source: PubMed Central journal article supplement — Ophthalmology. 2017 Dec;124(12):1753–63. doi: 10.1016/j.ophtha.2017.05.035 (PMC5755466; doi:10.1016/j.ophtha.2017.05.035), 2017-12
Supplement: mmc2.pdf [file mmc2.pdf]

# Figure 2

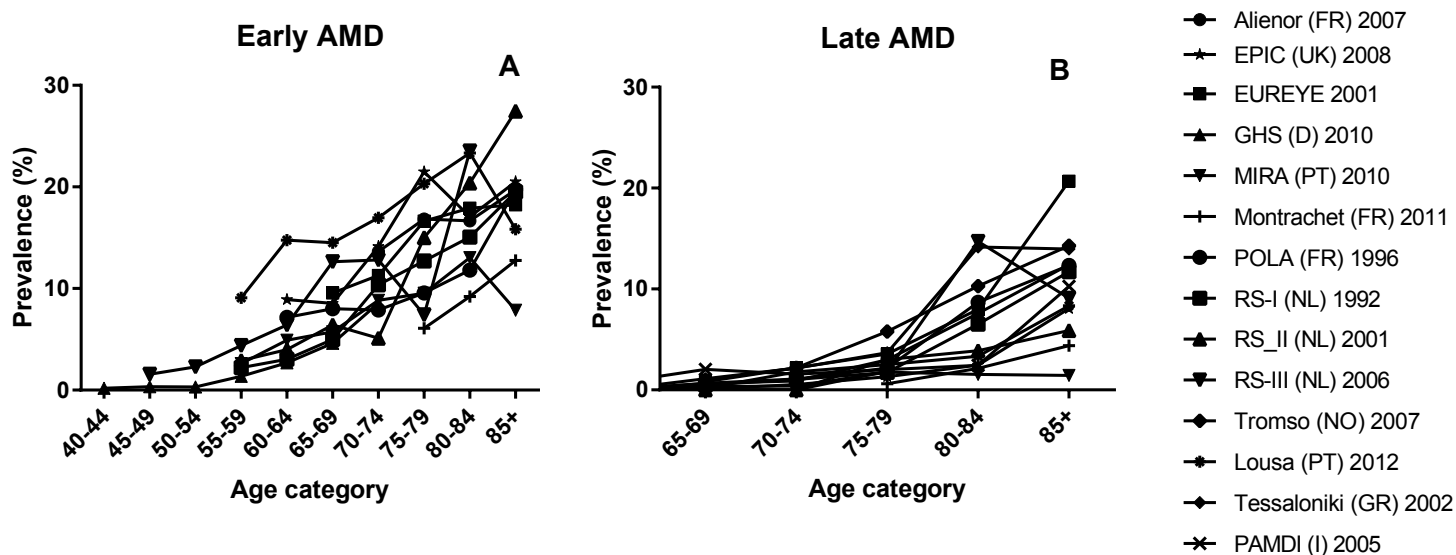

**Figure 2 a and b** Prevalence of Early (A) and Late (B) AMD per study

The legend shows the study corresponding with the symbol used in the graph including the country and the midpoint year of the recruiting period. The studies Tromsø from Norway, Thessaloniki Eye Study from Greece and EPIC from the UK did not have results for Early AMD.

Abbreviations: AMD = Age-related Macular Degeneration, D = Germany, FR = France, NL = Netherlands, NO = Norway, PT = Portugal, UK = United Kingdom
