# Supplementary material for: Prevalence of Age-Related Macular Degeneration in Europe: The Past and the Future
Source: PubMed Central journal article supplement — Ophthalmology. 2017 Dec;124(12):1753–63. doi: 10.1016/j.ophtha.2017.05.035 (PMC5755466; doi:10.1016/j.ophtha.2017.05.035), 2017-12
Supplement: mmc4.pdf [file mmc4.pdf]

# Figure 6

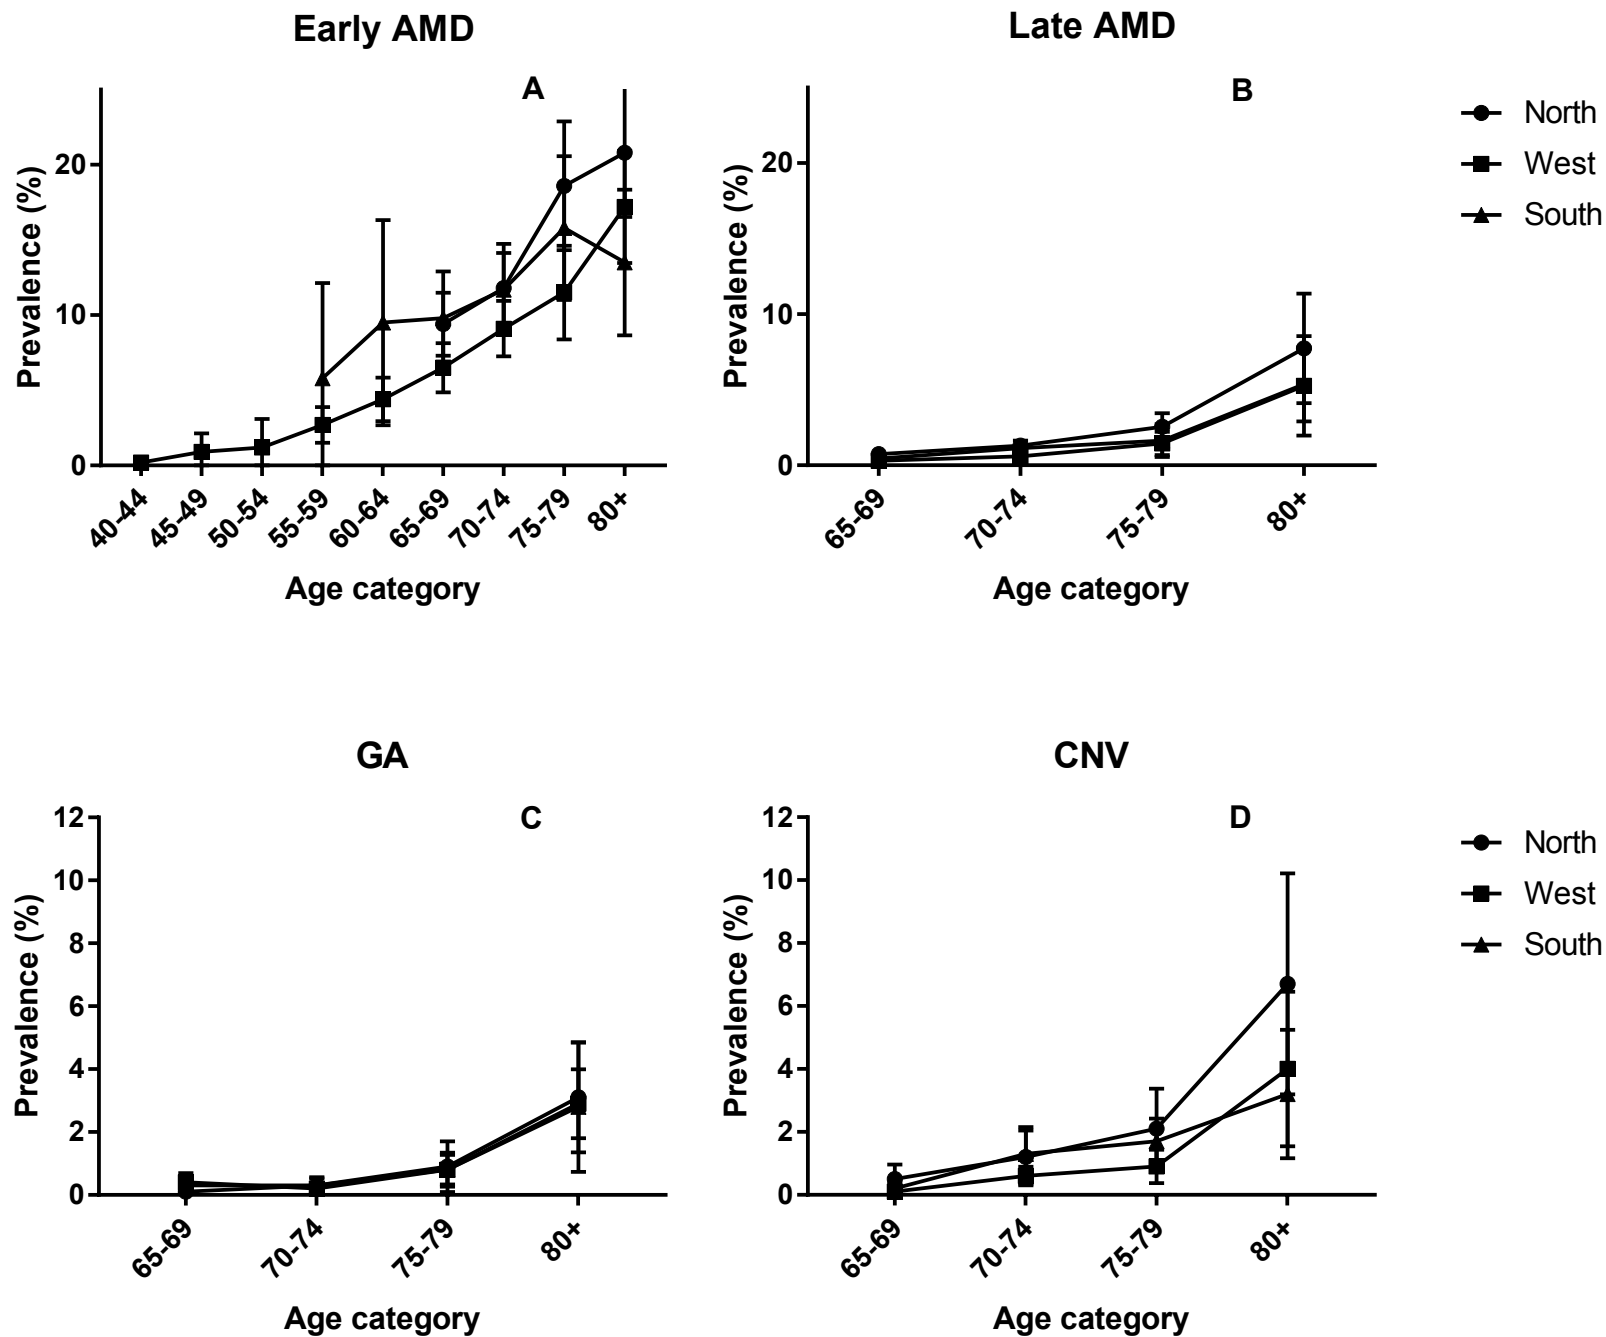

Figure 6 a, b, c and d Meta-analysis of the prevalence of Early (A) and Late (B) AMD , and of GA (C) and CNV (D) per geographical area.
