# Supplementary material for: Prevalence of Age-Related Macular Degeneration in Europe: The Past and the Future
Source: PubMed Central journal article supplement — Ophthalmology. 2017 Dec;124(12):1753–63. doi: 10.1016/j.ophtha.2017.05.035 (PMC5755466; doi:10.1016/j.ophtha.2017.05.035), 2017-12
Supplement: mmc5.pdf [file mmc5.pdf]

# Figure 9

Men

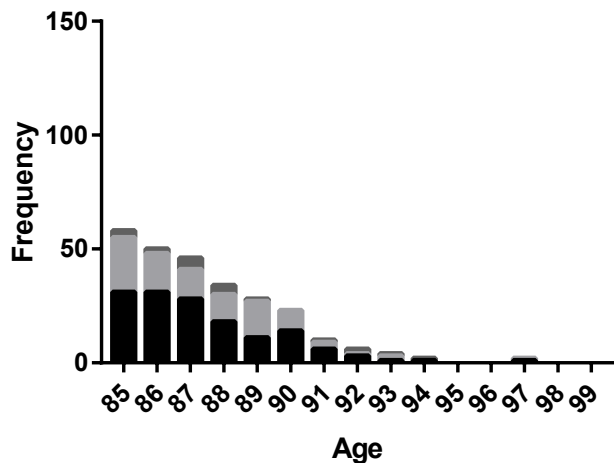

Women

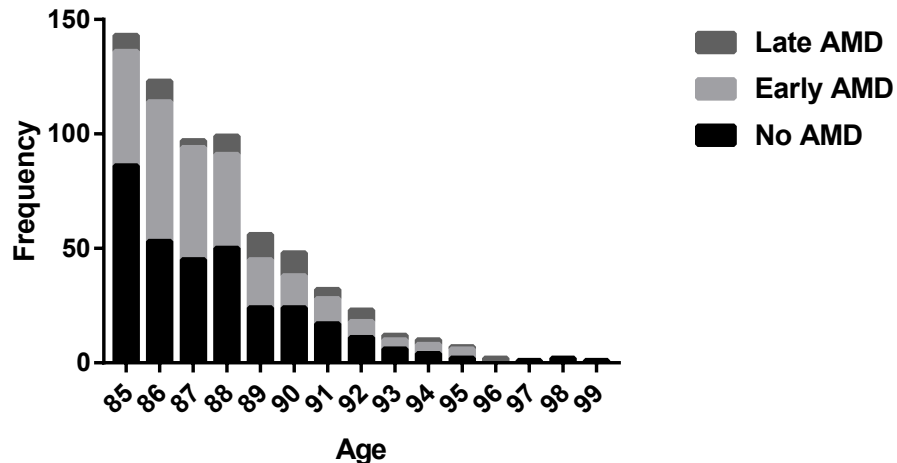

Men

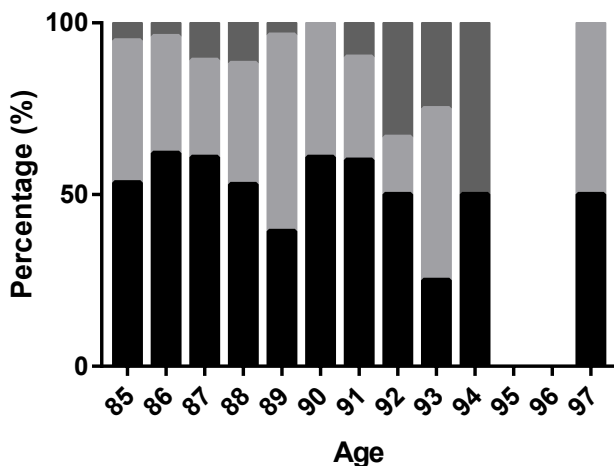

Women

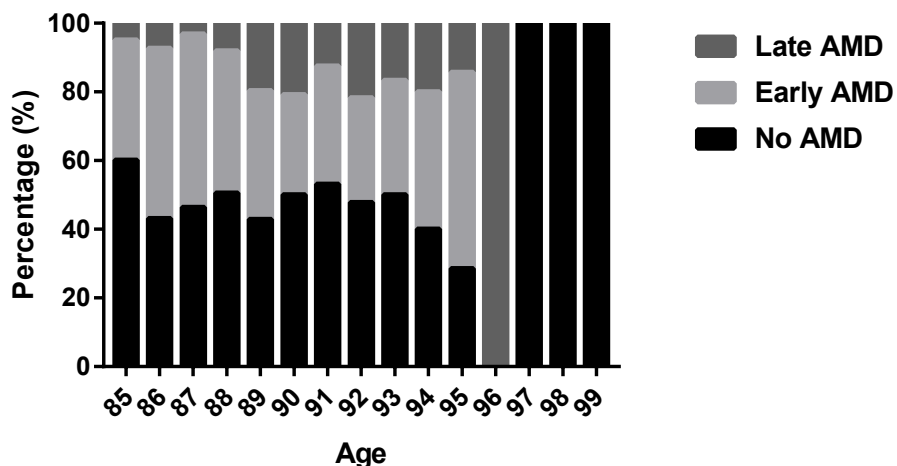

Figure 9 a, b, c and d Distribution of AMD in people aged 85 years and older from RS1,2,3, Alienor-3C, POLA and Montrachet-3C.
