# Supplementary material for: Prevalence of Age-Related Macular Degeneration in Europe: The Past and the Future
Source: PubMed Central journal article supplement — Ophthalmology. 2017 Dec;124(12):1753–63. doi: 10.1016/j.ophtha.2017.05.035 (PMC5755466; doi:10.1016/j.ophtha.2017.05.035), 2017-12
Supplement: mmc6.pdf [file mmc6.pdf]

**Table 2.** Prevalences of Early and Late AMD

| Age category | Early AMD      |                  | Late AMD       |            |
|--------------|----------------|------------------|----------------|------------|
|              | Prevalence (%) | 95% CI           | Prevalence (%) | 95% CI     |
| 40-44        | 0.2            | no meta-analysis |                |            |
| 45-49        | 0.9            | -0.3- 2.1        |                |            |
| 50-54        | 1.2            | -0.7 - 3.2       |                |            |
| 55-59        | 3.5            | 2.1 - 5.0        |                |            |
| 60-64        | 6.2            | 4.1 - 8.2        |                |            |
| 65-69        | 7.9            | 6.0 - 10.0       | 0.5            | 0.3 - 0.7  |
| 70-74        | 10.5           | 8.6 - 12.4       | 1.1            | 0.7 - 1.5  |
| 75-79        | 13.4           | 10.4 - 16.5      | 2.4            | 1.7 - 3.1  |
| 80-84        | 15.8           | 12.9 - 18.8      | 5.5            | 3.7 - 7.3  |
| 85+          | 17.6           | 13.6 - 21.5      | 9.8            | 6.3 - 13.3 |
