# Supplementary figures and images for: Prevalence of Age-Related Macular Degeneration in Europe: The Past and the Future
Source: PubMed Central journal article supplement — Ophthalmology. 2017 Dec;124(12):1753–63. doi: 10.1016/j.ophtha.2017.05.035 (PMC5755466; doi:10.1016/j.ophtha.2017.05.035), 2017-12

# Figure 5

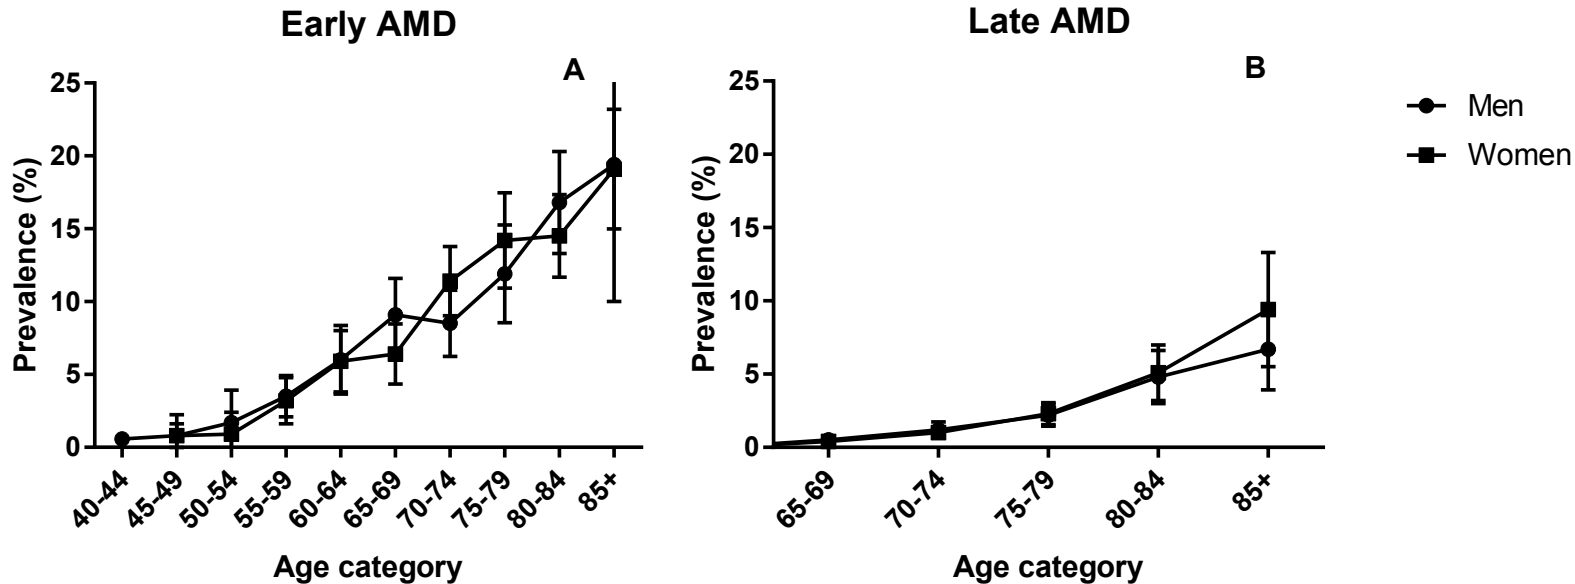

Figure 5 a and b Meta-analysis of the prevalence of Early (A) and Late (B) AMD for men and women

Supplement: mmc3.pdf [file mmc3.pdf]
